# Supplementary material
Source: Springer Nature journal article supplement (https://www.springermedizin.de/resource/supplementary/13063_2013_2025_MOESM2_ESM.pdf/9621188)
Supplement: MOESM2 [file 9621188]

Approached (in practice or by letter): N= 1687 (404 opportunistic, 1283 systematic)

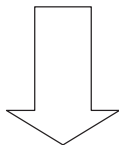

Consented and randomised: N= 131 (73 opportunistic, 58 systematic)

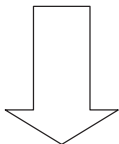

Written advice: N = 44

Brief advice: N = 42

Brief advice +  
pedometer: N = 45

Baseline:  
returned  
questionnaire  
n = 40;  
returned  
pedometer  
reading: n = 39

Follow-up:  
returned  
questionnaire:  
n = 37;  
returned  
pedometer  
reading: n = 36

Baseline:  
returned  
questionnaire:  
n = 35;  
returned  
pedometer  
reading: n = 35

Follow-up:  
returned  
questionnaire:  
n = 33;  
returned  
pedometer  
reading: n = 33

Baseline:  
returned  
questionnaire:  
n = 42;  
returned  
pedometer  
reading: n = 43

Follow-up:  
returned  
questionnaire  
n = 42;  
returned  
pedometer  
reading: n = 38
